# Supplementary material for: Characterizing parasitic nematode faunas in faeces and soil using DNA metabarcoding
Source: PubMed Central journal article supplement (PMC8380370; doi:10.1186/s13071-021-04935-8), 2021-08-21
Supplement: 13071_2021_4935_MOESM1_ESM.pdf [file 13071_2021_4935_MOESM1_ESM.pdf]

Table S1. Metabarcoding sequences retained after filtering, denoising, merging and chimera checking. Results are presented for processing of only the forward reads (Forward) as well as processing of the paired end forward and reverse reads together (Merged).

| sample    | sample_type          | raw     | Filtering |        | Denoising R1 |        | Denoising R2 |        | Merged  |        | Nonchimeric |        | Percent Retained |        |
|-----------|----------------------|---------|-----------|--------|--------------|--------|--------------|--------|---------|--------|-------------|--------|------------------|--------|
|           |                      |         | Forward   | Merged | Forward      | Merged | Forward      | Merged | Forward | Merged | Forward     | Merged | Forward          | Merged |
| sample_1  | bulk_soil            | 220516  | 37082     | 21026  | 30700        | 17526  |              | 20051  |         | 9875   | 30700       | 9875   | 13.9             | 4.5    |
| sample_2  | bulk_soil            | 141456  | 22703     | 14439  | 17273        | 10657  |              | 10190  |         | 5404   | 17256       | 5404   | 12.2             | 3.8    |
| sample_3  | bulk_soil            | 30704   | 4557      | 2741   | 2469         | 1285   |              | 1245   |         | 270    | 2469        | 270    | 8.0              | 0.9    |
| sample_4  | bulk_soil            | 110560  | 17583     | 10393  | 11798        | 6946   |              | 7724   |         | 2545   | 11782       | 2545   | 10.7             | 2.3    |
| sample_5  | bulk_soil            | 330736  | 53572     | 32853  | 44800        | 27262  |              | 26449  |         | 18215  | 43746       | 17576  | 13.2             | 5.3    |
| sample_6  | bulk_soil            | 207692  | 32835     | 20095  | 24266        | 14318  |              | 18050  |         | 5969   | 24203       | 5966   | 11.7             | 2.9    |
| sample_7  | bulk_soil            | 111364  | 16526     | 9338   | 11155        | 6634   |              | 6354   |         | 2228   | 11151       | 2228   | 10.0             | 2.0    |
| sample_8  | bulk_soil            | 141844  | 22045     | 13707  | 15885        | 9644   |              | 9383   |         | 3760   | 15885       | 3760   | 11.2             | 2.7    |
| sample_9  | bulk_soil            | 98112   | 15496     | 9389   | 11478        | 6749   |              | 6083   |         | 3505   | 11425       | 3488   | 11.6             | 3.6    |
| sample_10 | soil_flotation       | 115732  | 20918     | 14253  | 15883        | 11805  |              | 13098  |         | 7736   | 15883       | 7736   | 13.7             | 6.7    |
| sample_11 | soil_flotation       | 234136  | 41596     | 30097  | 33101        | 25872  |              | 28275  |         | 12969  | 31791       | 12593  | 13.6             | 5.4    |
| sample_12 | soil_flotation       | 557508  | 103241    | 70685  | 66533        | 53707  |              | 67984  |         | 41510  | 63964       | 38166  | 11.5             | 6.8    |
| sample_13 | soil_flotation       | 282180  | 51199     | 36067  | 43155        | 32521  |              | 33752  |         | 25043  | 41495       | 24449  | 14.7             | 8.7    |
| sample_14 | soil_flotation       | 94668   | 16672     | 11605  | 10901        | 8530   |              | 9669   |         | 7149   | 10542       | 6867   | 11.1             | 7.3    |
| sample_15 | soil_flotation       | 395180  | 74709     | 52822  | 66017        | 48909  |              | 50539  |         | 40430  | 63908       | 39575  | 16.2             | 10.0   |
| sample_16 | soil_flotation       | 127888  | 20370     | 13196  | 16785        | 11088  |              | 10955  |         | 7656   | 16709       | 7656   | 13.1             | 6.0    |
| sample_17 | soil_flotation       | 134244  | 22874     | 13876  | 18512        | 11230  |              | 11497  |         | 7247   | 18431       | 7240   | 13.7             | 5.4    |
| sample_18 | soil_flotation       | 68456   | 12783     | 9004   | 8684         | 7020   |              | 8306   |         | 6420   | 8684        | 6420   | 12.7             | 9.4    |
| sample_23 | faeces_sedimentation | 418008  | 79785     | 56735  | 47109        | 35948  |              | 48701  |         | 30384  | 46235       | 30172  | 11.1             | 7.2    |
| sample_24 | faeces_sedimentation | 342428  | 62433     | 44009  | 39139        | 31273  |              | 40888  |         | 25396  | 38673       | 25396  | 11.3             | 7.4    |
| sample_25 | faeces_sedimentation | 20616   | 3659      | 2682   | 3027         | 2322   |              | 2509   |         | 1800   | 3027        | 1800   | 14.7             | 8.7    |
| sample_26 | faeces_sedimentation | 226780  | 43328     | 33452  | 26692        | 24058  |              | 28373  |         | 19841  | 26098       | 19635  | 11.5             | 8.7    |
| sample_27 | faeces_sedimentation | 159320  | 28832     | 21693  | 19153        | 16164  |              | 19020  |         | 12397  | 18987       | 12380  | 11.9             | 7.8    |
| sample_32 | faeces_flotation     | 1194096 | 226773    | 179828 | 130139       | 120113 |              | 158401 |         | 94464  | 123722      | 92002  | 10.4             | 7.7    |
| sample_33 | faeces_flotation     | 970184  | 193200    | 149467 | 109673       | 98654  |              | 115238 |         | 69203  | 102113      | 66786  | 10.5             | 6.9    |

|                  |                  |         |        |        |        |        |  |        |  |        |        |        |      |     |
|------------------|------------------|---------|--------|--------|--------|--------|--|--------|--|--------|--------|--------|------|-----|
| <b>sample_34</b> | faeces_flotation | 1790856 | 354187 | 282270 | 189107 | 175299 |  | 237464 |  | 137657 | 180502 | 134037 | 10.1 | 7.5 |
| <b>sample_35</b> | faeces_flotation | 1035328 | 204589 | 164549 | 108798 | 104273 |  | 117434 |  | 75686  | 103029 | 74074  | 10.0 | 7.2 |
| <b>sample_36</b> | faeces_flotation | 600980  | 117407 | 88409  | 63160  | 56994  |  | 69001  |  | 43195  | 60235  | 42307  | 10.0 | 7.0 |
| <b>sample_41</b> | bulk_faeces      | 102568  | 18191  | 12608  | 13490  | 10216  |  | 11305  |  | 9110   | 13432  | 9110   | 13.1 | 8.9 |
| <b>sample_42</b> | bulk_faeces      | 170068  | 31017  | 22966  | 20255  | 16949  |  | 18903  |  | 13030  | 20079  | 13030  | 11.8 | 7.7 |
| <b>sample_43</b> | bulk_faeces      | 240544  | 43752  | 32317  | 29735  | 24053  |  | 30824  |  | 20158  | 29528  | 20141  | 12.3 | 8.4 |
| <b>sample_44</b> | bulk_faeces      | 201028  | 34091  | 22620  | 23760  | 16840  |  | 20269  |  | 14048  | 23270  | 13912  | 11.6 | 6.9 |
| <b>sample_45</b> | bulk_faeces      | 208984  | 35706  | 24791  | 24146  | 17960  |  | 19896  |  | 12734  | 23888  | 12606  | 11.4 | 6.0 |
